# Supplementary material
Source: PubMed Central journal article supplement (PMC6980791)
Supplement: NIHMS801685-supplement-Supplementary_Material.pdf [file NIHMS801685-supplement-Supplementary_Material.pdf]

# Bayesian Conditional Tensor Factorizations for High-Dimensional Classification

## Supplementary Appendix A: More properties of the conditional tensor factorization model

### Matrix form

We format the conditional probability  $P(y|x_1, \dots, x_p)$  as a  $d_1 \times \dots \times d_p$  vector

$$\text{Vec}\{P(y|-\)}\} = \{P(y|1, \dots, 1, 1), P(y|1, \dots, 1, 2), \dots, P(y|1, \dots, 1, d_p), \dots, \\ P(y|1, \dots, d_{p-1}, d_p), \dots, P(y|d_1, \dots, d_{p-1}, d_p)\}'$$

and  $\lambda_{h_1, \dots, h_p}(y)$  as a  $k_1 \times \dots \times k_p$  vector

$$\text{Vec}\{\Lambda(y)\} = \{\lambda_{1, \dots, 1, 1}(y), \lambda_{1, \dots, 1, 2}(y), \dots, \\ \lambda_{1, \dots, 1, k_p}(y), \dots, \lambda_{1, \dots, k_{p-1}, k_p}(y), \dots, \lambda_{k_1, \dots, k_p}(y)\}'.$$

Let  $\pi^{(j)}$  be a  $d_j \times k_j$  matrix with  $\pi_v^{(j)}(u)$  as the  $(u, v)$ th element. It is a stochastic matrix, so rows sum to one, by constraint (3). Then representation (2) can be written in vector form:

$$\text{Vec}\{P(y|-\)}\} = (\pi^{(1)} \otimes \pi^{(2)} \otimes \dots \otimes \pi^{(p)}) \text{Vec}\{\Lambda(y)\}, \text{ for } y = 1, \dots, d_0, \quad (\text{A.1})$$

where  $\otimes$  denotes the Kronecker product. Furthermore, if we let  $Mat(P)$  and  $Mat(\Lambda)$  be two stochastic matrices with the  $y$ th column  $Vec\{P(y|-)\}$  and  $Vec\{\Lambda(y)\}$  respectively for  $y = 1, \dots, d_0$ , then we can write the above  $d_0$  identities together as:

$$Mat(P) = (\pi^{(1)} \otimes \pi^{(2)} \otimes \dots \otimes \pi^{(p)}) Mat(\Lambda).$$

## Bias-variance trade-off

In tensor factorization model (2), the multirank  $k$  controls the sparsity, characterizing the impact of each predictor  $X_j$  through the “effective category count”  $k_j$ . For example, if the level of  $X_1$ , say 1, 2, 3, can be divided into 2 classes  $\{1\}$  and  $\{2, 3\}$  such that  $P(Y = y|X_1 = 2, \dots, X_p = x_p) \equiv P(Y = y|X_1 = 3, \dots, X_p = x_p)$ , then  $k_1$  is equal to 2. The following illustration suggests that to select  $k$ , we can use a hard clustering approximation by setting  $\pi_{h_j}^{(j)}(x_j)$  to be either zero or one (section 4.2).

We initially provide a heuristic argument to demonstrate the tendency of our model to produce low mean squared error (MSE), which is defined as:

$$\begin{aligned} \text{MSE}(\tilde{P}) &= \int \sum_{y=1}^{d_0} E(\tilde{P}(y|x_1, \dots, x_p) - P_0(y|x_1, \dots, x_p))^2 G(dx_1, \dots, dx_p) \\ &= \int \sum_{y=1}^{d_0} (E\tilde{P}(y|x_1, \dots, x_p) - P_0(y|x_1, \dots, x_p))^2 G(dx_1, \dots, dx_p) \\ &\quad + \int \sum_{y=1}^{d_0} \text{Var}\tilde{P}(y|x_1, \dots, x_p) G(dx_1, \dots, dx_p) \\ &\triangleq \text{Bias}^2(\tilde{P}) + \text{Var}(\tilde{P}), \end{aligned} \tag{A.2}$$

where  $\tilde{P}$  is an estimator of the truth  $P_0$ ,  $G$  is the joint marginal distribution of the covariates  $X$  and the expectation is taken with respect to the joint distribution of  $(X, Y)$ . Our focus is on obtaining accurate estimates of the conditional probability  $P(Y|X)$ ; accurate estimates

will lead to accurate classification while containing information on classification uncertainty, of critical importance in medical decision making among other areas.

For simplicity of exposition, assume the response  $Y$  to be binary. Denote by  $\mathcal{T}$  the set of all conditional probability tensors parameterized by (2). Let  $\mathcal{T}_0$  be a subset of  $\mathcal{T}$  consisting of models with  $\pi_{h_j}^{(j)}(x_j)$  being either zero or one. Then given  $k$  and  $\pi$ ,  $\pi^{(j)}$  uniquely determines a hard clustering of  $X_j$ :  $X_j = x_j$  belongs to the  $h_j(x_j)$ th cluster, where  $h_j(x_j)$  is the unique  $h_j$  such that  $\pi_{h_j}^{(j)}(x_j) = 1$ . Consider approximating  $P_0$  by this subset  $\mathcal{T}_0$ . Intuitively, the best MSE attained within  $\mathcal{T}_0$  gives an upper bound on the optimal MSE achievable by the whole model class  $\mathcal{T}$ . To demonstrate the bias-variance trade-off in terms of the selection of the multirank  $k$ , we compare the MSE of the maximum likelihood estimators (MLE) in model space  $\mathcal{T}_0$  under different  $k$  and the clustering scheme determined by  $\pi$ . Define

$$\epsilon_M = \inf_{P \in \mathcal{T}_0: |k(P)| \leq M} \|P - P_0\|,$$

where  $|k(P)|$  denotes the size of the multirank of the conditional probability tensor  $P$  and

$$\|P - P_0\| = \left\{ \int \sum_{y=1}^2 |P(y|x_1, \dots, x_p) - P_0(y|x_1, \dots, x_p)|^2 G(dx_1, \dots, dx_p) \right\}^{1/2}. \quad (\text{A.3})$$

$\epsilon_M$  can be interpreted as the smallest error or bias caused by approximating  $P_0$  using  $P \in \mathcal{T}_0$  with size  $|k(P)| \leq M$ , related to compressibility of  $P_0$ .

Under degeneracy of the  $\pi$ 's,  $P(y|x_1, \dots, x_p) = \lambda_{h_1(x_1)\dots h_p(x_p)}(y)$ , where  $h_j(x_j)$  is defined previously as the unique  $h_j$  such that  $\pi_{h_j}^{(j)}(x_j) = 1$ . Given  $k$  and  $\pi$ , the MLE of  $\lambda_{h_1\dots h_p}$  is the sample frequencies of  $Y_i = y$  among all observations with covariates  $X_i = (X_{i1}, \dots, X_{ip})$  satisfying  $h_j(X_{ij}) = h_j$  for each  $j = 1, \dots, p$ :

$$\hat{\lambda}_{h_1\dots h_p}(i) = \frac{\sum_{(x_1, \dots, x_p): h_j(x_j) = h_j} \sum_{i=1}^n I(X_{i1} = x_1, \dots, X_{ip} = x_p, Y_i = i)}{\sum_{(x_1, \dots, x_p): h_j(x_j) = h_j} \sum_{i=1}^n I(X_{i1} = x_1, \dots, X_{ip} = x_p)}, \quad i = 1, 2,$$

where  $0/0$  is defined to be 0 for simplicity. Although given  $k$  and  $\pi$  an unbiased estimator does not exist due to model misspecification, the following lemma shows that this MLE is still optimal in terms of minimizing the bias. A proof is sketched in the appendix.

**Lemma 1** *Given  $k$  and  $\pi$ , among all estimators of  $\lambda$ 's, the MLE defined above minimizes the  $\text{Bias}^2(\tilde{P})$  in (A.2).*

This lemma indicates that the  $\epsilon_M$  has another characterization as

$$\epsilon_M = \min_{(k,\pi):|k|\leq M,\pi \text{ degenerate}} \text{Bias}(\hat{P}(k, \pi)),$$

where  $\hat{P}(k, \pi)$  is the MLE of  $P$  given  $(k, \pi)$ .

Intuitively, under the degeneracy of  $\pi$ ,  $n$  samples are separated into  $|k|$  clusters to estimate the corresponding  $\lambda$ 's, and the variance term in (A.2) should be of order  $|k|/n$ . The following lemma formalizes this and a proof is sketched in the appendix.

**Lemma 2** *Given  $k$  and  $\pi$ , the  $\text{Var}(\tilde{P})$  as defined in (A.2) for the MLE  $\hat{P}$  satisfies*

$$\text{Var}(\hat{P}(k, \pi)) = C|k|/n + O(|k|/n^2), \tag{A.4}$$

where the constant  $C \in [a, b]$ , where  $a, b > 0$  only depends on  $P_0$  and  $G$ .

Combining Lemma 1 and 2, given  $k$  and  $\pi$ , the MSE of MLE  $\hat{P}$  satisfies:

$$\text{MSE}(\hat{P}(k, \pi)) \geq \epsilon_{|k|}^2 + C \frac{|k|}{n} + O(|k|/n^2).$$

This reflects the so-called bias-variance trade-off for our model: as  $|k|$  increases, the model becomes more complex and thus the bias term decreases; however, the variance term increases as more parameters are introduced. Therefore, there exists an optimal model size  $|k|$  that

solves  $|k| = n\epsilon_{|k|}^2$  minimizing the MSE. This typical trade-off also appears in the Assumption B in section 3.2 where the posterior convergence rate is studied.

## Borrowing of information

The previous section discussed the bias-variance trade-off for a subclass of models specified by (2), where  $\pi$ 's are degenerate at zero and one. In this section, we illustrate another desirable property by allowing  $\pi$ 's to be continuous on  $[0, 1]$ : borrowing of information across cells corresponding to each combination of  $X_1, \dots, X_p$ . Letting  $w_{h_1, \dots, h_p}(x_1, \dots, x_p) = \prod_j \pi_{h_j}^{(j)}(x_j)$ , model (2) is equivalent to

$$P(Y = y | X_1 = x_1, \dots, X_p = x_p) = \sum_{h_1, \dots, h_p} w_{h_1, \dots, h_p}(x_1, \dots, x_p) \lambda_{h_1 \dots h_p}(y), \quad (\text{A.5})$$

and constraints (3) imply  $\sum_{h_1, \dots, h_p} w_{h_1, \dots, h_p}(x_1, \dots, x_p) = 1$ . In the special case when  $\pi$  is degenerate,  $\lambda_{h_1 \dots h_p}(y)$  is just the conditional probability of  $Y = y$  given the observations in cluster  $h_1(X_1) = h_1, \dots, h_p(X_p) = h_p$  (for details, refer to the descriptions in the paragraph before (A.3)). If  $\pi$ 's are allowed to be continuous, then our model essentially uses a kernel estimate that allows borrowing of information across clusters via a weighted average of the cluster frequencies.

To illustrate the strength of this, consider a simplified example involving one covariate  $X$  with  $m$  categories and a binary response  $Y$ . In fact, each category of  $X$  can correspond to a cluster as in the preceding paragraph and the implications can be extended to our model by changing the notations. Let  $P_j = P(Y = 1 | X = j)$  for  $j = 1, \dots, m$ . Then the MLE for  $(P_1, \dots, P_m)$  is sample frequencies  $(s_1/n_1, \dots, s_m/n_m)$ , denoted by  $(\hat{P}_1, \dots, \hat{P}_m)$ , where  $s_j = \#\{i : y_i = 1 \text{ and } x_i = j\}$  and  $n_j = \#\{i : x_i = j\}$ . Instead, kernel estimates (A.5) are

$$\tilde{P}_k = \left\{ 1 - \sum_{j \neq k} w_{jk} \right\} \hat{P}_k + \sum_{j \neq k} w_{jk} \hat{P}_j, \quad k = 1, \dots, m,$$

where  $w_{jk}$  could be considered as the weight of the contribution to cluster  $k$  by cluster  $j$ . MLE corresponds to a special case when  $w_{jk} = 0$  for all  $j \neq k$ . We use squared loss to compare these two estimators. After some calculations,

$$E\{L(\hat{P}, P)\} = \sum_{j=1}^m E(\hat{P}_j - P_j)^2 = \sum_{j=1}^m \frac{P_j(1 - P_j)}{n_j},$$

and  $E\{L(\tilde{P}, P)\} = \sum_{j=1}^m E(\tilde{P}_j - P_j)^2$  is a function of  $w_{jk}$ 's, whose partial derivative with respect to  $w_{jk}$  ( $j \neq k$ ) at zero is

$$\left. \frac{\partial E\{L(\tilde{P}, P)\}}{\partial w_{jk}} \right|_{w_{st}=0, \forall s \neq t} = -2 \frac{P_k(1 - P_k)}{n_k}.$$

This implies that  $E\{L(\tilde{P}, P)\}$  will be reduced by  $2 \frac{P_k(1 - P_k)}{n_k}$  for every unit increasing of  $w_{jk}$  near zero. Particularly when  $n_k$  is small, borrowing information from other cluster  $j$  ( $j \neq k$ ) will considerably reduce  $E\{L(\tilde{P}, P)\}$  compare to MLE. In the special case when all  $w_{jk}$  are equal,  $E\{L(\tilde{P}, P)\}$  can attain a minimum

$$E\{L(\hat{P}, P)\} \left[ 1 - \left( 1 - \frac{1}{m} \right) \frac{E\{L(\hat{P}, P)\}}{E\{L(\hat{P}, P)\} + \frac{1}{m-1} \sum_{i < j} (P_i - P_j)^2} \right] \\ \in \left( \frac{1}{m} E\{L(\hat{P}, P)\}, E\{L(\hat{P}, P)\} \right).$$

This suggests that when  $P_j$ 's are similar, the estimate  $\tilde{P}$  can reduce the risk up to only  $1/m$  the risk of estimating  $\hat{P}$  separately. If  $P_j$ 's are not similar,  $\tilde{P}$  can still reduce the risk considerably when the cell counts  $\{n_j\}$  are small.

Another interesting feature of our tensor model is the special structure of the weights  $w$ 's in (A.5). Consider a class of continuous  $\tilde{\pi}$ 's indexed by a single parameter  $c \in (0, 1)$

characterizing the strength of borrowing information,

$$\tilde{\pi}_{h_j}^{(j)}(x_j) = (1 - k_j c) I\{h_j = h_j(x_j)\} + c I\{h_j \neq h_j(x_j)\},$$

for  $h_j \leq k_j$  and all possible  $x_j$ 's. This  $\tilde{\pi}$  still satisfies constraint (A.12) and the weight becomes

$$\tilde{w}_{h_1, \dots, h_p}(x_1, \dots, x_p) = \prod_{j=1}^p (1 - k_j c)^{I\{h_j = h_j(x_j)\}} c^{I\{h_j \neq h_j(x_j)\}}.$$

When  $c$  is small, given  $x$ , the weight of the contribution by the cluster indexed by  $(h_1, \dots, h_p)$  is approximately equal to  $c^s$ , where  $s = \sum_{j=1}^p I\{h_j \neq h_j(x_j)\}$  is the number of latent classes not shared by  $(h_1, \dots, h_p)$  and  $(h_1(x_1), \dots, h_p(x_p))$ , i.e. the Hamming distances between the latent class indices. This special structure in the weights suggests that similar clusters should share more information.

## Supplementary Appendix B: Proof of Lemma 1

Given the degeneracy of  $\pi$ , the bias square term can be written as

$$\text{Bias}^2 = \sum_{y=1}^2 \sum_{h_1, \dots, h_p} \int_{A_{h_1 \dots h_p}} (E\tilde{\lambda}_{h_1 \dots h_p}(y) - P_0(y|x_1, \dots, x_p))^2 G(dx_1, \dots, dx_p),$$

where  $A_{h_1 \dots h_p} = \{(x_1, \dots, x_p) : h_j(x_j) = h_j, j = 1, \dots, p\}$  and  $\tilde{\lambda}$ 's are arbitrary estimators of  $\lambda$ 's. It can be verified that the above expression is minimized if and only if:

$$E\tilde{\lambda}_{h_1 \dots h_p}(y) = \frac{\int_{A_{h_1 \dots h_p}} P_0(y|x_1, \dots, x_p) G(dx_1, \dots, dx_p)}{\int_{A_{h_1 \dots h_p}} G(dx_1, \dots, dx_p)} \quad (\text{A.6})$$

holds for all possible  $(h_1, \dots, h_p)$ . So we only need to check the the MLE  $\hat{\lambda}$ 's satisfy this condition.

Let  $N_{x_1, \dots, x_p} = \sum_{i=1}^n I(X_{i1} = x_1, \dots, X_{ip} = x_p)$ ,  $\bar{N}_{h_1, \dots, h_p} = \sum_{A_{h_1 \dots h_p}} N_{x_1, \dots, x_p}$ ,  $X = \{X_1, \dots, X_p\}$  and  $Y = \{Y_1, \dots, Y_p\}$ . By the iterative expectation formula:

$$E_{X,Y} \hat{\lambda}_{h_1 \dots h_p}(y) = \sum_{A_{h_1 \dots h_p}} E_X \frac{N_{x_1, \dots, x_p}}{\bar{N}_{h_1, \dots, h_p}} P_0(y|x_1, \dots, x_p). \quad (\text{A.7})$$

Note that

$$N_{x_1, \dots, x_p} | \bar{N}_{h_1, \dots, h_p} \sim \text{Bin} \left( \bar{N}_{h_1, \dots, h_p}, \frac{G(x_1, \dots, x_p)}{\int_{A_{h_1 \dots h_p}} G(dx_1, \dots, dx_p)} \right). \quad (\text{A.8})$$

Combining this and the iterative expectation formula:

$$E_X \frac{N_{x_1, \dots, x_p}}{\bar{N}_{h_1, \dots, h_p}} P_0(y|x_1, \dots, x_p) = \frac{G(x_1, \dots, x_p)}{\int_{A_{h_1 \dots h_p}} G(dx_1, \dots, dx_p)} P_0(y|x_1, \dots, x_p). \quad (\text{A.9})$$

Combining (A.7) and (A.9) together, we can prove that (A.6) holds for the MLE  $\hat{\lambda}$ .

## Supplementary Appendix C: Proof of Lemma 2

Under the same notation as in Lemma 1,

$$\begin{aligned} \text{Var} &= \sum_{y=1}^2 \sum_{h_1, \dots, h_p} \int_{A_{h_1 \dots h_p}} E_{X,Y} (\hat{\lambda}_{h_1 \dots h_p} - E_{X,Y} \hat{\lambda}_{h_1 \dots h_p})^2 G(dx_1, \dots, dx_p) \\ &= \sum_{y=1}^2 \sum_{h_1, \dots, h_p} \int_{A_{h_1 \dots h_p}} E_X \text{Var}_{Y|X} (\hat{\lambda}_{h_1 \dots h_p} - E_{Y|X} \hat{\lambda}_{h_1 \dots h_p})^2 G(dx_1, \dots, dx_p) \\ &\quad + \sum_{y=1}^2 \sum_{h_1, \dots, h_p} \int_{A_{h_1 \dots h_p}} E_X (E_{Y|X} \hat{\lambda}_{h_1 \dots h_p} - E_{X,Y} \hat{\lambda}_{h_1 \dots h_p})^2 G(dx_1, \dots, dx_p) \\ &\triangleq S_1 + S_2, \end{aligned}$$



where  $E_{Y|X}$  and  $Var_{Y|X}$  stand for taking conditional expectation and variance given  $X$ , respectively.

*Estimation of  $S_1$ :* First, we estimate the integrand in  $S_1$  similar to (A.7):

$$\begin{aligned} & E_X Var_{Y|X} (\hat{\lambda}_{h_1 \dots h_p} - E_{Y|X} \hat{\lambda}_{h_1 \dots h_p})^2 \\ &= \sum_{A_{h_1 \dots h_p}} E_X \frac{N_{x_1, \dots, x_p}}{\bar{N}_{h_1, \dots, h_p}^2} P_0(y|x_1, \dots, x_p) (1 - P_0(y|x_1, \dots, x_p)) \\ &= \frac{\int_{A_{h_1 \dots h_p}} P_0(y|x_1, \dots, x_p) (1 - P_0(y|x_1, \dots, x_p)) G(dx_1, \dots, dx_p)}{\int_{A_{h_1 \dots h_p}} G(dx_1, \dots, dx_p)} E_X \frac{I(\bar{N}_{h_1, \dots, h_p} > 0)}{\bar{N}_{h_1, \dots, h_p}}, \end{aligned}$$

where the last step is by (A.8) and the iterative expectation formula. Since  $\bar{N}_{h_1, \dots, h_p} \sim \text{Bin}(n, \int_{A_{h_1 \dots h_p}} G(dx_1, \dots, dx_p))$ , by the asymptotic expansion for the expectation of reciprocal of Binomial random variables in Stephan (1945),

$$E_X \frac{I(\bar{N}_{h_1, \dots, h_p} > 0)}{\bar{N}_{h_1, \dots, h_p}} = \frac{1}{n \int_{A_{h_1 \dots h_p}} G(dx_1, \dots, dx_p)} + O(n^{-2}), \quad (\text{A.10})$$

we obtain

$$S_1 = C_1 \sum_{y=1}^2 \sum_{h_1, \dots, h_p} (1/n + o(n^{-2})) = 2C_1 |k|/n + O(|k|/n^2),$$

where  $C_1$  is some constant with lower and upper bounds independent of  $n$ .

*Estimation of  $S_2$ :* By (A.9), the integrand in  $S_2$  is:

$$\begin{aligned} & E_X (E_{Y|X} \hat{\lambda}_{h_1 \dots h_p} - E_{X,Y} \hat{\lambda}_{h_1 \dots h_p})^2 \\ &= E_X \left( \sum_{A_{h_1 \dots h_p}} \left( \frac{N_{x_1, \dots, x_p}}{\bar{N}_{h_1, \dots, h_p}} - \frac{G(x_1, \dots, x_p)}{\int_{A_{h_1 \dots h_p}} G(dx_1, \dots, dx_p)} \right) P_0(y|x_1, \dots, x_p) \right)^2. \end{aligned}$$

Similar to (A.8), the joint conditional distribution of  $N_{x_1, \dots, x_p}$  given  $\bar{N}_{h_1, \dots, h_p}$  follows a multi-

nomial distribution:

$$\begin{aligned} & \{N_{x_1, \dots, x_p} : (x_1, \dots, x_p) \in A_{h_1 \dots h_p}\} | \bar{N}_{h_1, \dots, h_p} \\ & \sim \text{Multi} \left( \bar{N}_{h_1, \dots, h_p}, \left\{ \frac{G(x_1, \dots, x_p)}{\int_{A_{h_1 \dots h_p}} G(dx_1, \dots, dx_p)} : (x_1, \dots, x_p) \in A_{h_1 \dots h_p} \right\} \right). \end{aligned}$$

As a result, by the iterative expectation formula,  $E_X (E_{Y|X} \hat{\lambda}_{h_1 \dots h_p} - E_{X,Y} \hat{\lambda}_{h_1 \dots h_p})^2$  is also proportional to  $E_X \frac{I(\bar{N}_{h_1, \dots, h_p} > 0)}{\bar{N}_{h_1, \dots, h_p}}$ . Therefore, by (A.10)

$$S_2 = C_2 \sum_{y=1}^2 \sum_{h_1, \dots, h_p} (1/n + o(n^{-2})) = 2C_2 |k|/n + O(|k|/n^2),$$

where  $C_2$  is some constant with lower and upper bounds independent of  $n$ .

Combining the estimation of  $S_1$  and  $S_2$ , we obtain the desired results with  $C = 2C_1 + 2C_2$ .

## Supplementary Appendix D: Proof of Theorem 2

The following two lemmas are needed to prove this theorem. The proof of lemma 1 can be found in Jiang (2006), and the proof of lemma 2 follows the line of Ghosal et al. (2000) and is given here.

**Lemma 3** *Let  $\mathcal{P}$  be a subset of all probability measures of  $X$ ,  $P_0 \in \mathcal{P}$  and  $d$  be the total variance distance, then for each  $\epsilon > 0$  and  $n > 0$ , there exists a test  $\phi_n$  such that*

$$\begin{aligned} P_0^n \phi_n & \leq N \left( \frac{\epsilon}{4}, \mathcal{P}, d \right) \exp \left( -\frac{n}{8} \epsilon^2 \right), \\ \sup_{P \in \mathcal{P} \cap \{P: d(P, P_0) \geq \epsilon\}} P^n (1 - \phi_n) & \leq \exp \left( -\frac{n}{8} \epsilon^2 \right), \end{aligned}$$

where  $P^n$  is the  $n$ -fold of  $P$ .

**Lemma 4** *If  $\Pi_n(P : \|\log \frac{P}{P_0}\|_\infty < \epsilon_n^2) > \exp(-Cn\epsilon_n^2)$ , then for any test  $\phi_n$ , the following*

inequality holds:

$$E_{P_0} \Pi_n(P : d(P, P_0) \geq \epsilon_n | X_1, \dots, X_n) \leq P_0^n \phi_n + \exp((1+C)n\epsilon_n^2) \Pi_n(\mathcal{P}_n^c) + \exp((1+C)n\epsilon_n^2) \sup_{\mathcal{P}_n \cap \{P : d(P, P_0) \geq \epsilon_n\}} P^n (1 - \phi_n).$$

**Lemma 2** We can divide the l.h.s. into two pieces

$$\begin{aligned} E_{P_0} \Pi_n(P : d(P, P_0) \geq \epsilon_n | X_1, \dots, X_n) &= \\ E_{P_0} \Pi_n(P : d(P, P_0) \geq \epsilon_n | X_1, \dots, X_n) \phi_n & \\ + E_{P_0} \Pi_n(P : d(P, P_0) \geq \epsilon_n | X_1, \dots, X_n) (1 - \phi_n). & \end{aligned} \quad (\text{A.11})$$

The first term satisfies

$$E_{P_0} \Pi_n(P : d(P, P_0) \geq \epsilon_n | X_1, \dots, X_n) \phi_n \leq P_0^n \phi_n. \quad (\text{A.12})$$

Next we will estimate the second term. By definition, we have

$$\begin{aligned} E_{P_0} \Pi_n(P : d(P, P_0) \geq \epsilon_n | X_1, \dots, X_n) (1 - \phi_n) &= \\ E_{P_0} \frac{\int_{d(P, P_0) \geq \epsilon_n} \prod_{i=1}^n \frac{P}{P_0}(X_i) d\Pi_n(P) (1 - \phi_n)}{\int \prod_{i=1}^n \frac{P}{P_0}(X_i) d\Pi_n(P)}. & \end{aligned} \quad (\text{A.13})$$

Let  $K_n = \{P : \|\log \frac{P}{P_0}\|_\infty < \epsilon_n^2\}$ . Using the condition  $\Pi_n(K_n) > \exp(-Cn\epsilon_n^2)$ , we have

$$\begin{aligned} \int \prod_{i=1}^n \frac{P}{P_0}(X_i) d\Pi_n(P) &\geq \int_{K_n} \prod_{i=1}^n \frac{P}{P_0}(X_i) d\Pi_n(P) \\ &\geq \Pi_n(K_n) \exp(-n\epsilon_n^2) \geq \exp(-(1+C)n\epsilon_n^2) \text{ a.s. } P_0^n. \end{aligned}$$

By Fubini's theorem and the fact  $0 \leq \phi_n \leq 1$

$$\begin{aligned}
& E_{P_0} \int_{d(P, P_0) \geq \epsilon_n} \prod_{i=1}^n \frac{P}{P_0}(X_i) d\Pi_n(P) (1 - \phi_n) \\
& \leq \Pi_n(\mathcal{P}_n^c) + \int_{\mathcal{P}_n \cap \{P: d(P, P_0) \geq \epsilon_n\}} P^n (1 - \phi_n) d\Pi_n(P) \\
& \leq \Pi_n(\mathcal{P}_n^c) + \sup_{\mathcal{P}_n \cap \{P: d(P, P_0) \geq \epsilon_n\}} P^n (1 - \phi_n).
\end{aligned}$$

Combining the above assertions and equation (A.13), we can see that

$$\begin{aligned}
& E_{P_0} \Pi_n(P : d(P, P_0) \geq \epsilon_n | X_1, \dots, X_n) (1 - \phi_n) \\
& \leq \exp((1 + C)n\epsilon_n^2) E_{P_0} \int_{d(P, P_0) \geq \epsilon_n} \prod_{i=1}^n \frac{P}{P_0}(X_i) d\Pi_n(P) (1 - \phi_n) \tag{A.14} \\
& \leq \exp((1 + C)n\epsilon_n^2) \Pi_n(\mathcal{P}_n^c) + \exp((1 + C)n\epsilon_n^2) \sup_{\mathcal{P}_n \cap \{P: d(P, P_0) \geq \epsilon_n\}} P^n (1 - \phi_n).
\end{aligned}$$

Combining (A.11), (A.12) and (A.14) will lead to the conclusion.

**Theorem 4 in the paper** Let the test in the lemma 2 to be the test  $\phi_n$  defined in lemma 1 with  $\epsilon = M\epsilon_n$  and  $M^2 > 16 + 8C$ . Using the condition (a), (b) in the Theorem 4, we have

$$\begin{aligned}
& E_{P_0} \Pi_n(P : d(P, P_0) \geq M\epsilon_n | X_1, \dots, X_n) \leq \\
& \exp(-n\epsilon_n^2) + \exp(-n\epsilon_n^2) + \exp(-n\epsilon_n^2) = 3 \exp(-n\epsilon_n^2).
\end{aligned}$$

So

$$E_{P_0} \sum_n \Pi_n(P : d(P, P_0) \geq M\epsilon_n | X_1, \dots, X_n) \leq 3 \sum_n \exp(-n\epsilon_n^2) < \infty.$$

Thus we have

$$\sum_n \Pi_n(P : d(P, P_0) \geq M\epsilon_n | X_1, \dots, X_n) < \infty \text{ a.s. } P_0^n,$$

and

$$\Pi_n(P : d(P, P_0) \geq M\epsilon_n | X_1, \dots, X_n) \rightarrow 0 \text{ a.s. } P_0^n.$$

## References

- Ghosal, H., J. K. Ghosh, and A. W. Van Der Vaart (2000). Convergence rates of posterior distributions. *Ann. Statist.* *28*, 500–531.
- Jiang, W. (2006). Bayesian variable selection for high dimensional generalized linear models. *Ann. Statist.* *35*, 1487–1511.
- Stephan, F. F. (1945). The expected value and variance of the reciprocal and other negative powers of a positive Bernoullian variate. *Ann. Math. Statist.* *16*, 50–61.
